# Supplementary material for: Effects of NO x and SO 2 on the secondary organic aerosol formation from photooxidation of α -pinene and limonene
Source: Copernicus journal article supplement (doi:10.5194/acp-18-1611-2018), 2018-02-05
Supplement: Supplementary file 1 [file acp-18-1611-2018-supplement.pdf]

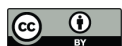

*Supplement of*

## **Effects of $\text{NO}_x$ and $\text{SO}_2$ on the secondary organic aerosol formation from photooxidation of $\alpha$ -pinene and limonene**

**Defeng Zhao et al.**

*Correspondence to:* Thomas F. Mentel ([t.mentel@fz-juelich.de](mailto:t.mentel@fz-juelich.de))

The copyright of individual parts of the supplement might differ from the CC BY 3.0 License.

Table S1. Detailed conditions of the experiments in this study

| Experiment No. | VOC (ppb)               | SO <sub>2</sub> added (ppb) | NO added (ppb) | T (K) <sup>a</sup> | RH (%) <sup>b</sup> | Scheme                                           |
|----------------|-------------------------|-----------------------------|----------------|--------------------|---------------------|--------------------------------------------------|
| #1             | $\alpha$ -pinene (20.2) | 0                           | 0              | 304-311-314        | 32                  | Low NO <sub>x</sub><br>low SO <sub>2</sub>       |
| #2             | $\alpha$ -pinene (21.4) | 0                           | 19             | 307-314-317        | 29                  | Low NO <sub>x</sub><br>high SO <sub>2</sub>      |
| #3             | $\alpha$ -pinene (17.5) | 15                          | 0              | 291-298-302        | 34                  | High NO <sub>x</sub><br>low SO <sub>2</sub>      |
| #4             | $\alpha$ -pinene (18.7) | 15                          | 17             | 300-303-305        | 42                  | High NO <sub>x</sub><br>how SO <sub>2</sub>      |
| #5             | Limonene (7.4)          | 0                           | 0              | 294-303-307        | 31                  | Low NO <sub>x</sub><br>low SO <sub>2</sub>       |
| #6             | Limonene (7.5)          | 0                           | 25             | 303-310-313        | 28                  | Low NO <sub>x</sub><br>high SO <sub>2</sub>      |
| #7             | Limonene (7.8)          | 15                          | 0              | 293-301-305        | 29                  | High NO <sub>x</sub><br>low SO <sub>2</sub>      |
| #8             | Limonene (7.4)          | 15                          | 17             | 296-305-309        | 28                  | High NO <sub>x</sub><br>high SO <sub>2</sub>     |
| #9             | Limonene (6.0)          | 2                           | 17             | 296-306-310        | 28                  | High NO <sub>x</sub><br>moderate SO <sub>2</sub> |

<sup>a</sup>: The minimum, average and maximum temperature are shown.

<sup>b</sup>: The average RHs of the period of monoterpenes photooxidation are shown.

Table S2. Summary of the effect of NO<sub>x</sub> on monoterpene SOA yield in the literature

| VOC                                                        | Oxidation      | NO <sub>x</sub> (ppb)                                                               | Seed aerosol                                                                                                                                              | OH source/OH centration<br>(molecules cm <sup>-3</sup> )                                                                                                                                   | RH<br>(%)        | Literature                    |
|------------------------------------------------------------|----------------|-------------------------------------------------------------------------------------|-----------------------------------------------------------------------------------------------------------------------------------------------------------|--------------------------------------------------------------------------------------------------------------------------------------------------------------------------------------------|------------------|-------------------------------|
| $\alpha$ -pinene<br>15-30 ppb;<br>150-200 ppb <sup>a</sup> | Ozonolysis     | 4.6 - 2000 ppb<br>[VOC] <sub>0</sub> /[NO <sub>x</sub> ] <sub>0</sub> :<br>0.65-391 | No seed <sup>b</sup>                                                                                                                                      | Low OH <sup>c</sup>                                                                                                                                                                        | Dry <sup>d</sup> | (Presto et al.,<br>2005)      |
| $\alpha$ -pinene<br>15 ppb                                 | Photooxidation | ≤2-1000 ppb                                                                         | (NH <sub>4</sub> ) <sub>2</sub> SO <sub>4</sub> as<br>seed                                                                                                | Low NO <sub>x</sub> : 3×10 <sup>6</sup> ; high NO <sub>x</sub> : initial<br>2×10 <sup>7</sup>                                                                                              | 3.7-6.4          | (Ng et al., 2007)             |
| $\alpha$ -pinene<br>19.8-52.4 ppb                          | Photooxidation | Low NO <sub>x</sub> : not<br>reported.<br>High NO <sub>x</sub> : 800<br>ppb         | No seed,<br>(NH <sub>4</sub> ) <sub>2</sub> SO <sub>4</sub> or<br>(NH <sub>4</sub> ) <sub>2</sub> SO <sub>4</sub><br>+H <sub>2</sub> SO <sub>4</sub>      | Low NO <sub>x</sub> : H <sub>2</sub> O <sub>2</sub> /initial OH 2×10 <sup>6</sup> ;<br>high NO <sub>x</sub> : HONO and<br>CH <sub>3</sub> NO <sub>2</sub> /initial OH 6-20×10 <sup>6</sup> | <10              | (Eddingsaas et<br>al., 2012)  |
| $\alpha$ -pinene<br>12 ppb                                 | Photooxidation | 0.5 ppb-60 ppb<br>(steady state)                                                    | No seed,<br>(NH <sub>4</sub> ) <sub>2</sub> SO <sub>4</sub>                                                                                               | O <sub>3</sub> (78 ppb)/~4-7×10 <sup>7</sup>                                                                                                                                               | 63               | (Sarrafzadeh et<br>al., 2016) |
| $\alpha$ -pinene<br>13.6-20.4 ppb                          | Photooxidation | Low NO <sub>x</sub> : <0.3<br>ppb<br>High NO <sub>x</sub> : 66-82<br>ppb            | (NH <sub>4</sub> ) <sub>2</sub> SO <sub>4</sub> or<br>(NH <sub>4</sub> ) <sub>2</sub> SO <sub>4</sub><br>+H <sub>2</sub> SO <sub>4</sub>                  | H <sub>2</sub> O <sub>2</sub> /<br>low NO <sub>x</sub> : OH 0.8-1.1×10 <sup>6</sup> ; high NO <sub>x</sub> :<br>OH 4.3-5.9×10 <sup>6</sup>                                                 | 29-68            | (Han et al., 2016)            |
| $\alpha$ -pinene<br>16.1-31.7 ppb                          | Photooxidation | Low NO <sub>x</sub> : <1.9<br>ppb<br>High NO <sub>x</sub> :<br>19.675.1 ppb         | (NH <sub>4</sub> ) <sub>2</sub> SO <sub>4</sub><br>+H <sub>2</sub> SO <sub>4</sub> or<br>H <sub>2</sub> SO <sub>4</sub> +NH <sub>4</sub> HSO <sub>4</sub> | HONO/N.A. <sup>e</sup>                                                                                                                                                                     | 23-75            | (Stirnweis et al.,<br>2017)   |
| $\alpha$ -pinene<br>~20 ppb                                | Photooxidation | Low NO <sub>x</sub> :<br>~0.05-0.2 ppb<br>High NO <sub>x</sub> : 20<br>ppb          | No seed or SO <sub>2</sub><br>was added.                                                                                                                  | HONO/<br>OH: (1-15)×10 <sup>6</sup>                                                                                                                                                        | 28-42            | This study                    |

<sup>a</sup>: Two levels of  $\alpha$ -pinene concentration were used.<sup>b</sup>: In one high NO<sub>x</sub> experiment (NH<sub>4</sub>)<sub>2</sub>SO<sub>4</sub> was used as seed aerosol.<sup>c</sup>: OH scavenger was added.<sup>d</sup>: RH was not specified.<sup>e</sup>: OH concentrations were not specified.

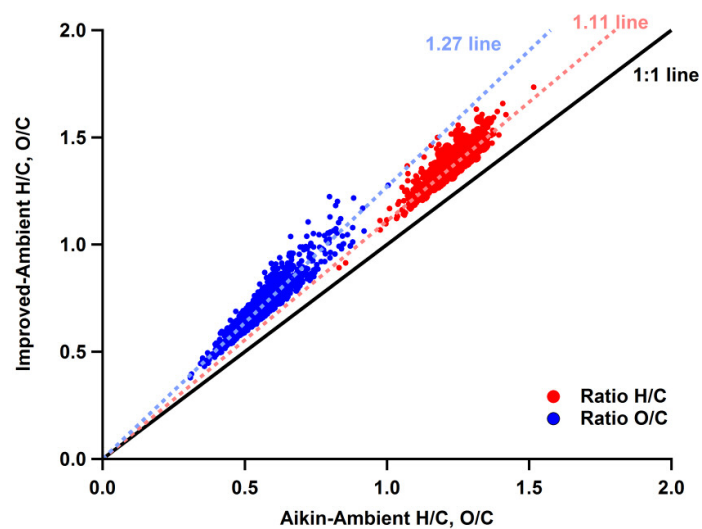

Figure S1. Comparison of the H/C and O/C obtained using the method of Canagaratna et al. (2015) with that obtained using the method of Aiken et al. (2007).

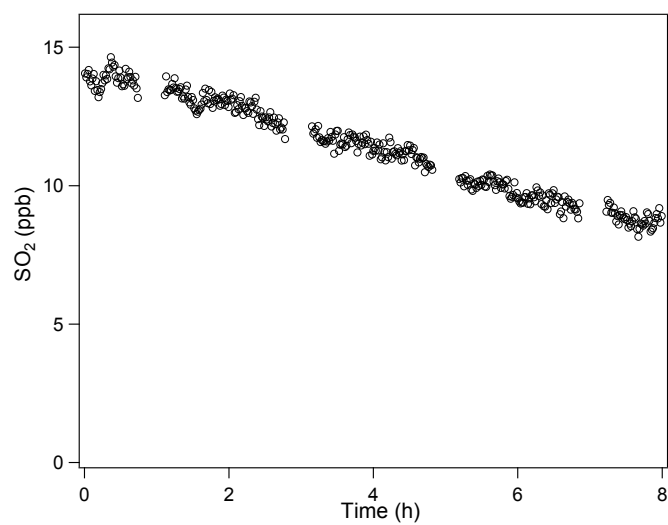

1  
2 Figure S2. Time series of  $\text{SO}_2$  concentration in an experiment with  $\text{SO}_2$  added.

3  
4  
5

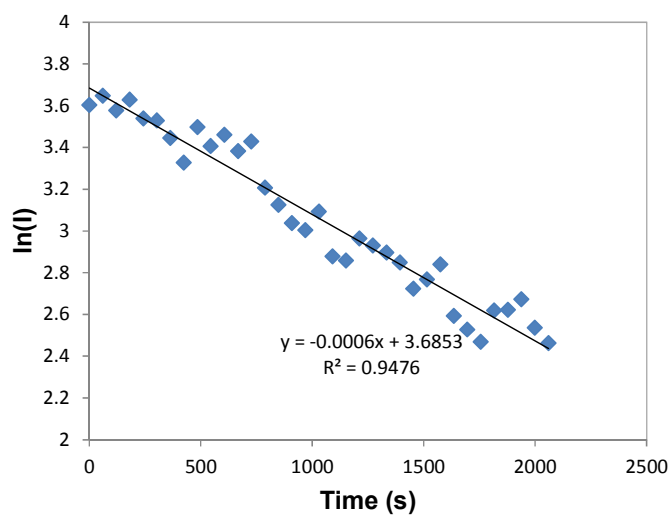

6  
7 Figure S3. Decay of  $\text{C}_{10}\text{H}_{15}\text{NO}_8$  (MW 277 g/mol) in the dark chamber. Y-axis shows the natural logarithm of the  
8 peak intensity obtained from CIMS. The raw data were averaged to 1 min.

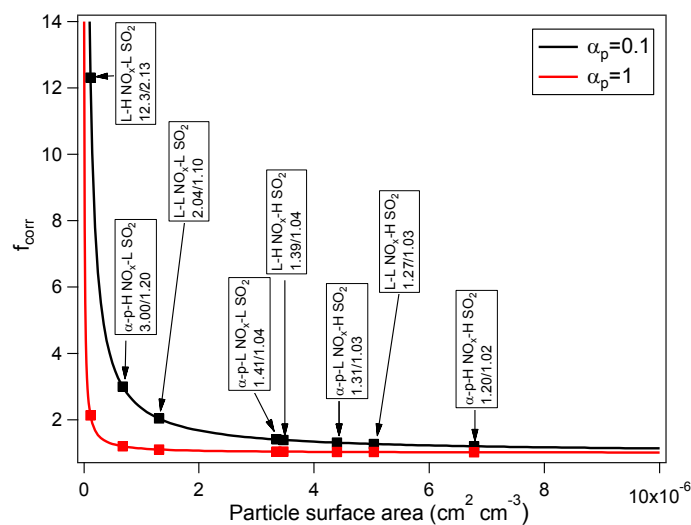

(a)

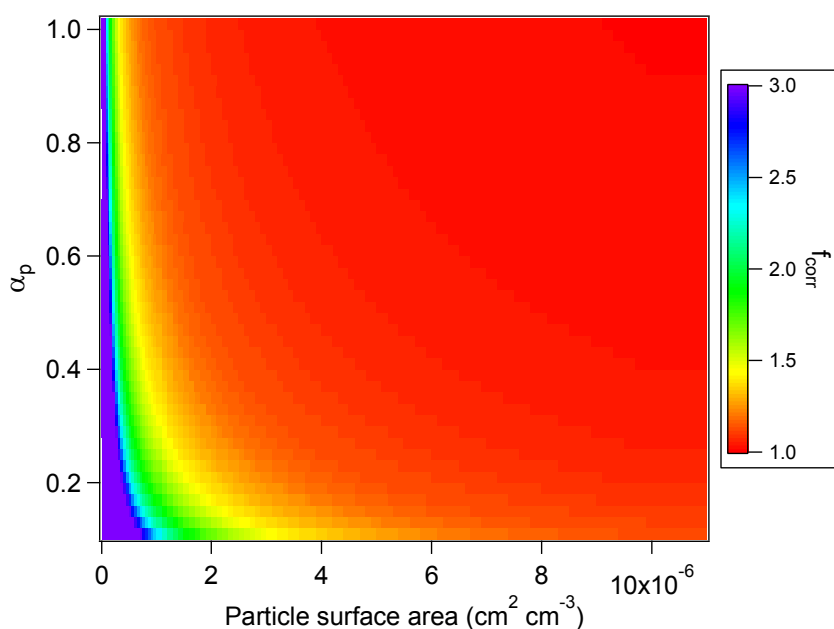

(b)

Figure S4. (a) Correction factor ( $f_{\text{corr}}$ ) to account for the influence of vapor wall loss on SOA yield. The curves were derived using an average molecular weight of 200 g/mol and an accommodation coefficient ( $\alpha_p$ ) on particles of 0.1 and 1, respectively. The lines show the  $f_{\text{corr}}$  as a function of aerosol surface area concentration and solid squares show the peak aerosol surface area concentration in each experiment. The experiments corresponding to each points are shown. “ $\alpha$ -p” and “L” denote  $\alpha$ -pinene and limonene, respectively. “L” and “H” denote low and high, respectively. For example, “ $\alpha$ -p-H NO<sub>x</sub>-L SO<sub>2</sub>” denote the experiment of  $\alpha$ -pinene oxidation under high NO<sub>x</sub> and low SO<sub>2</sub>. And the two numbers in each label box show the correction factors ( $f_{\text{corr}}$ ) derived using  $\alpha_p$  of 0.1 and 1, respectively. (b). Correction factor ( $f_{\text{corr}}$ ) as a function of particle surface area and accommodation coefficient of organic vapors.

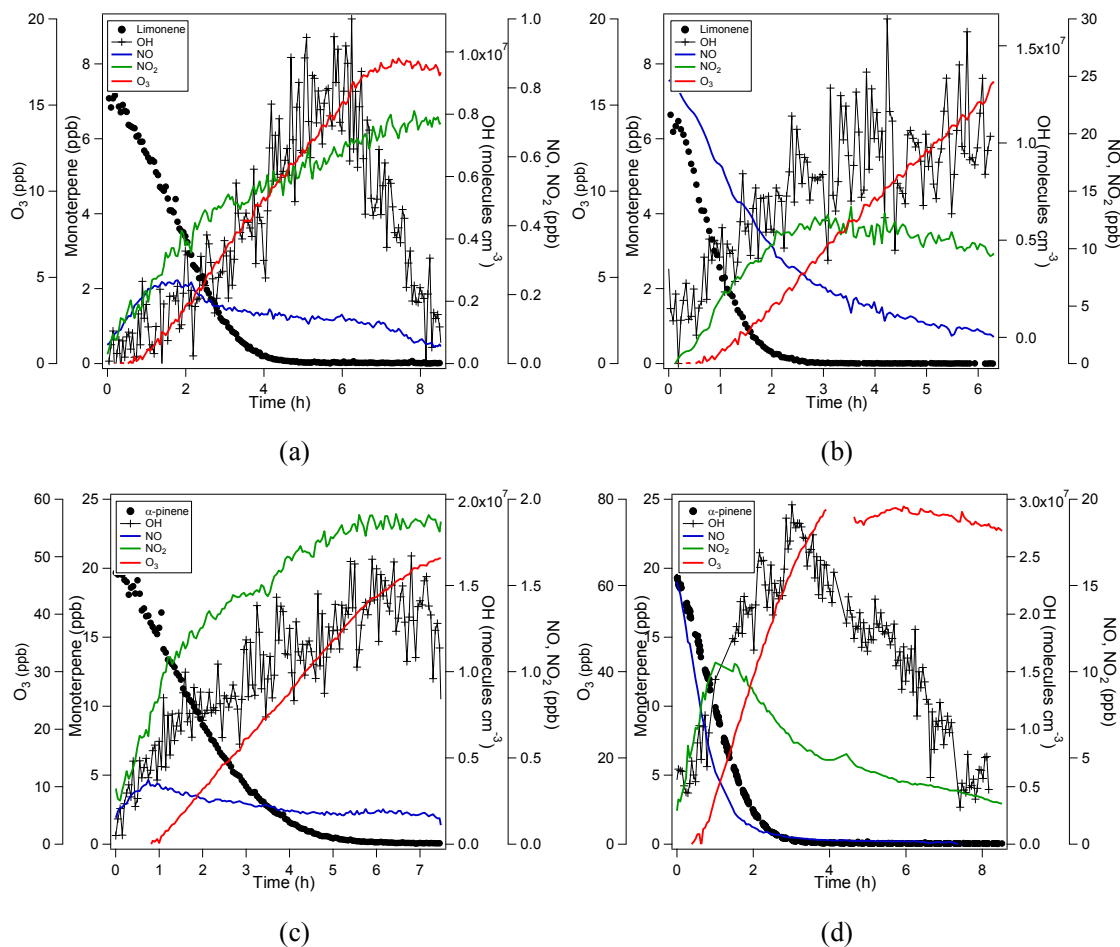

Figure S5. Time series of VOC, OH, NO, NO<sub>2</sub>, and O<sub>3</sub> concentrations at low SO<sub>2</sub> for low NO<sub>x</sub> (a, c) and high NO<sub>x</sub> (b, d). (a, b) and (c, d) are for limonene and  $\alpha$ -pinene photooxidation, respectively. Similar trends were observed under high SO<sub>2</sub>.



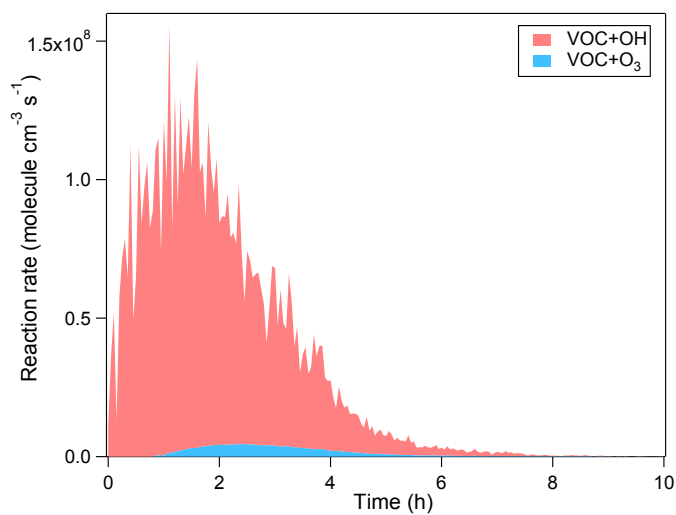

Figure S6. Comparison of the reaction rates of monoterpane with OH and with O<sub>3</sub> in a typical experiment of this study. The reaction rate of VOC+OH is stacked on that of VOC+O<sub>3</sub>. Monoterpane oxidation was dominated by OH oxidation. Here the data in  $\alpha$ -pinene photooxidation at low NO<sub>x</sub> are shown. The scattering of the reaction rate of monoterpane with OH is due to the variations in the OH concentrations and OH measurement.

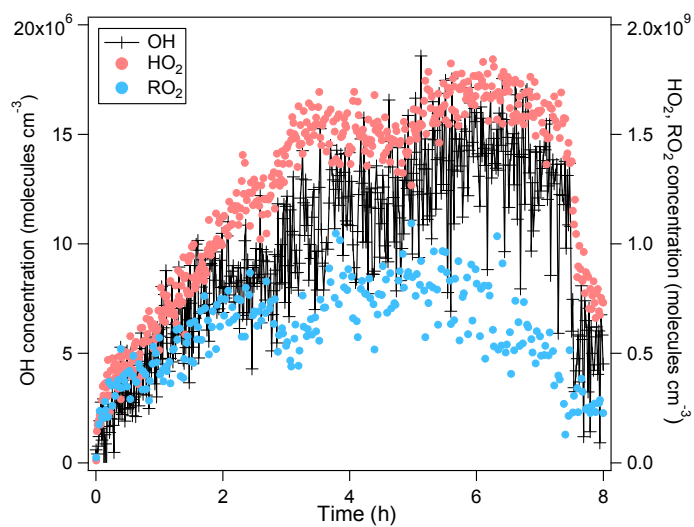

Figure S7. The concentrations of OH, HO<sub>2</sub> and RO<sub>2</sub> radicals in a typical experiment of this study. Here the data in α-pinene photooxidation at low NO<sub>x</sub> are shown.

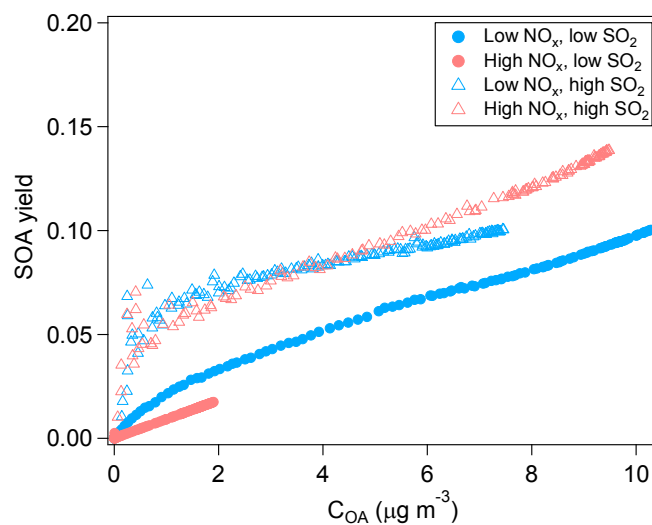

(a)

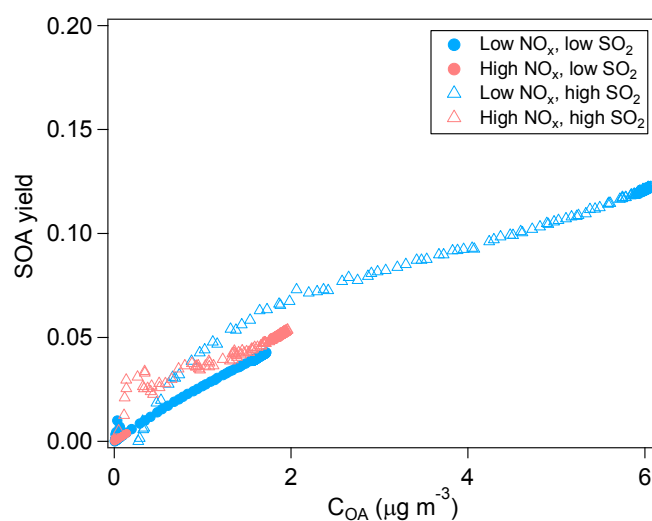

(b)

Figure S8. SOA yield from the photooxidation of  $\alpha$ -pinene (a) and limonene (b) as a function of organic aerosol concentration ( $C_{OA}$ ) in different  $NO_x$  and  $SO_2$  conditions. Both SOA yield and organic aerosol concentration were corrected for particle wall loss and dilution.

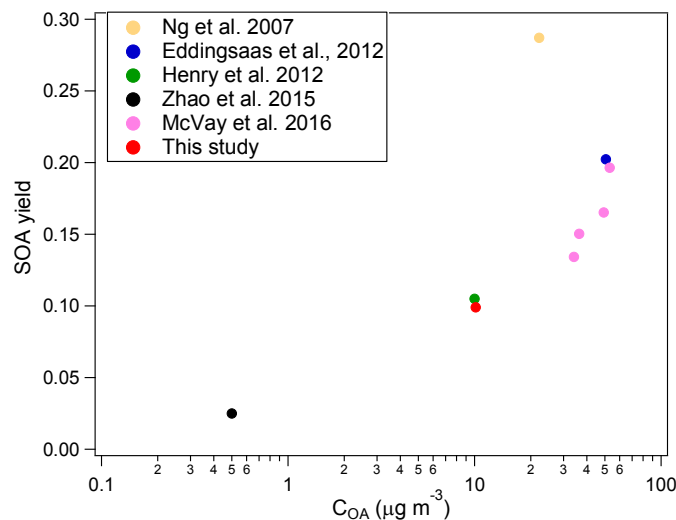

48

49 Figure S9. Comparison of the SOA yield as a function of organic aerosol concentration from  $\alpha$ -pinene  
 50 photooxidation at low  $\text{NO}_x$  with literature data. SOA yield and organic aerosol concentration in this study were  
 51 corrected for particle wall loss and dilution. SOA particle density in all studies was adjusted to  $1 \text{ g cm}^{-3}$ . The data  
 52 for Henry et al. (2012) was extracted from Figure 2, experiment 1 in their study. The data for McVay et al. (2016)  
 53 were extracted from Figure 2-4 in their study. The data extracted from figures in the literature may be subject to  
 54 uncertainties.

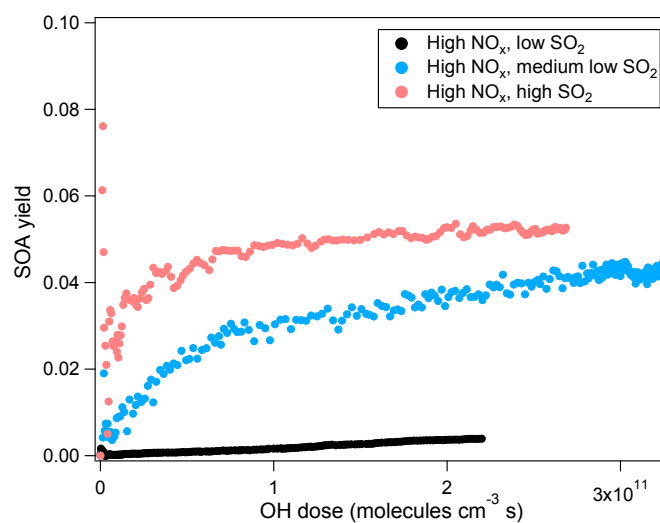

56  
 57 Figure S10. SOA yield at varying SO<sub>2</sub> concentrations for SOA from limonene oxidation at high NO<sub>x</sub>. The SO<sub>2</sub>  
 58 concentrations for low SO<sub>2</sub>, moderate SO<sub>2</sub> and high SO<sub>2</sub> are <0.05 ppb, 2 ppb and 15 ppb, respectively.

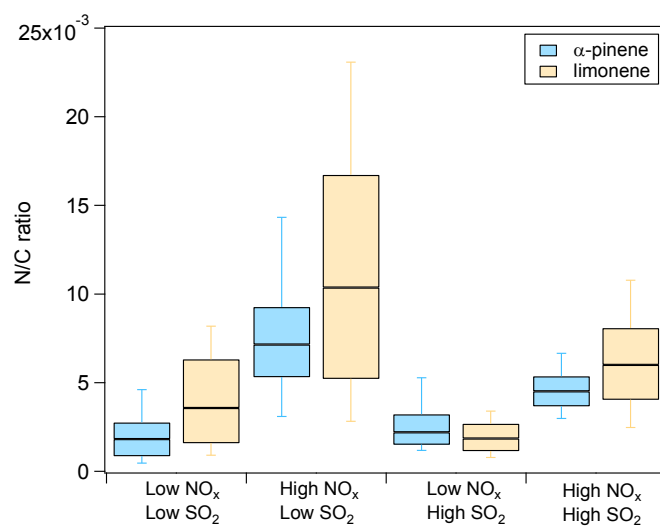

59  
 60 Figure S11. The nitrogen to carbon ratio (N/C) in the SOA formed in different conditions for  $\alpha$ -pinene and  
 61 limonene oxidation. The black line, box, and whiskers show the median, 25<sup>th</sup> and 75<sup>th</sup> percentile, and 10<sup>th</sup> and 90<sup>th</sup>  
 62 percentile, respectively.

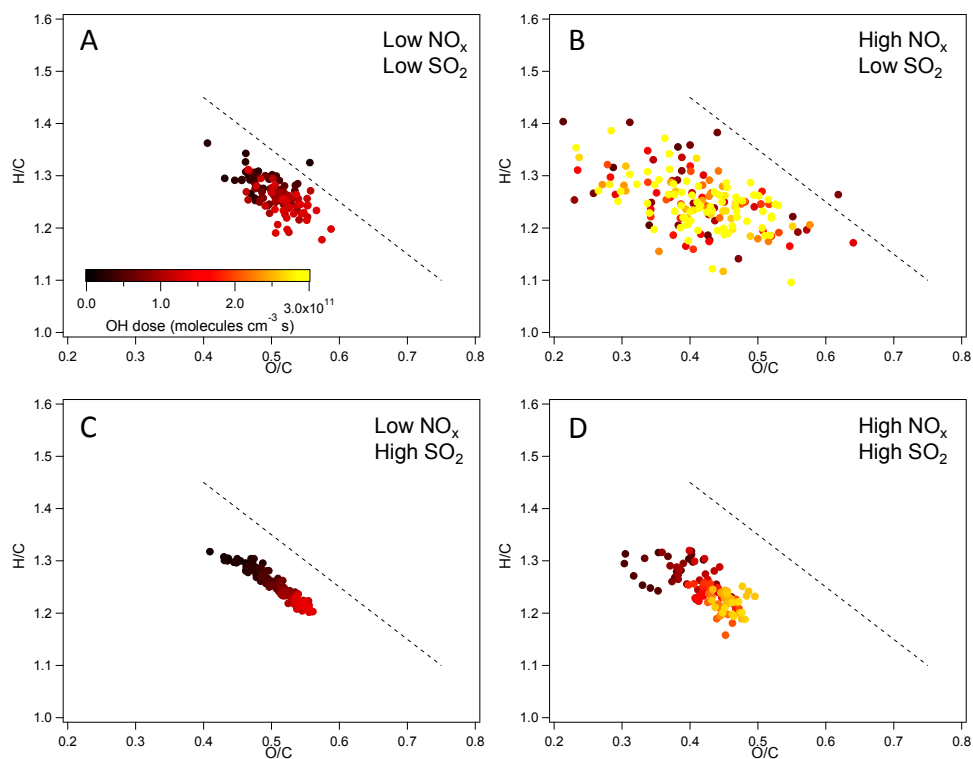

Figure S12. H/C and O/C ratios of SOA from photooxidation of limonene in different NO<sub>x</sub> and SO<sub>2</sub> conditions. A: low NO<sub>x</sub>, low SO<sub>2</sub>, B: high NO<sub>x</sub>, low SO<sub>2</sub>, C: low NO<sub>x</sub>, high SO<sub>2</sub>, D: high NO<sub>x</sub>, high SO<sub>2</sub>. Note that in the high NO<sub>x</sub>, low SO<sub>2</sub> condition (panel B), the AMS signal was too low to derive reliable H/C and O/C due to the low particle mass concentration and small particle size. Therefore, the data from an experiment with high NO<sub>x</sub> (20 ppb NO) and moderate SO<sub>2</sub> (2 ppb) is shown instead in panel B. The black dashed line corresponds to the slope of -1.

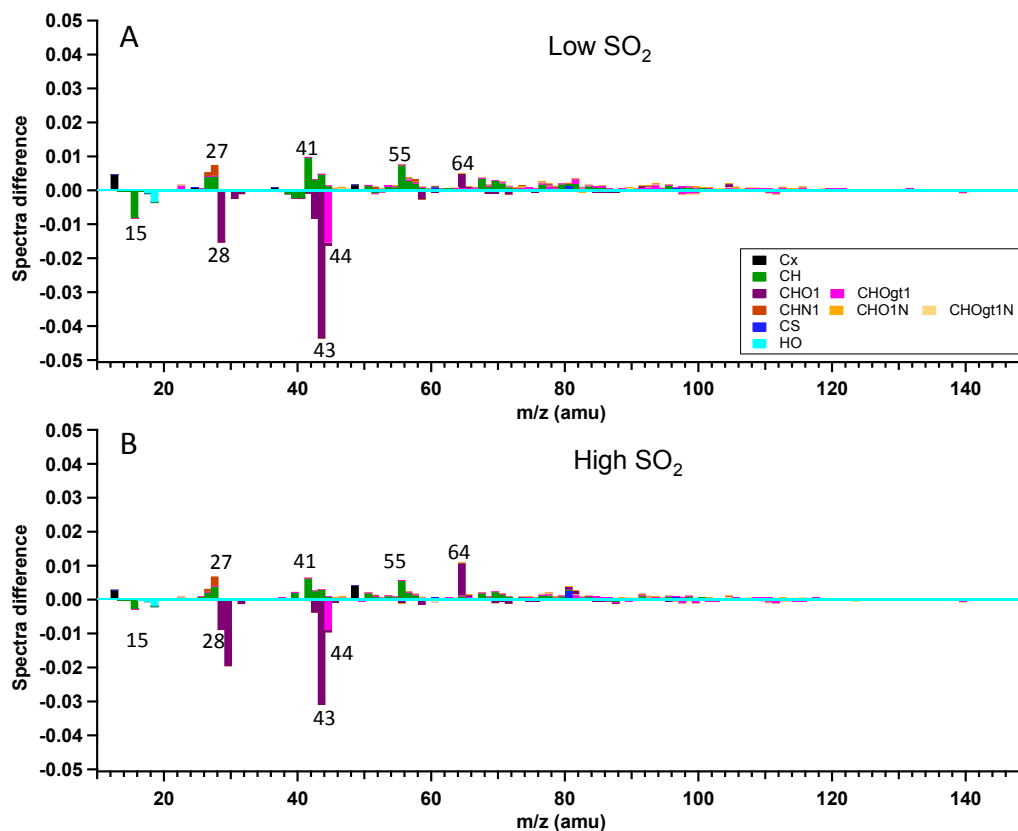

Figure S13. The difference in the mass spectra of organics of the SOA from limonene photooxidation between high  $\text{NO}_x$  and low  $\text{NO}_x$  conditions (high  $\text{NO}_x$ -low  $\text{NO}_x$ ). SOA was formed at low  $\text{SO}_2$  (a) and high  $\text{SO}_2$  (b). The different chemical family of high resolution mass peaks are stacked at each unit mass  $m/z$  (“gt1” means greater than 1). The mass spectra were normalized to the total organic signals. Note that in the high  $\text{NO}_x$ , low  $\text{SO}_2$  condition (panel A), the signal of AMS was too low. Therefore, the data in panel A show an experiment with high  $\text{NO}_x$  (20 ppb  $\text{NO}$ ) and moderate  $\text{SO}_2$  (2 ppb) instead.



## References

- Aiken, A. C., DeCarlo, P. F., and Jimenez, J. L.: Elemental analysis of organic species with electron ionization high-resolution mass spectrometry, *Anal. Chem.*, 79, 8350-8358, 10.1021/ac071150w, 2007.
- Canagaratna, M. R., Jimenez, J. L., Kroll, J. H., Chen, Q., Kessler, S. H., Massoli, P., Hildebrandt Ruiz, L., Fortner, E., Williams, L. R., Wilson, K. R., Surratt, J. D., Donahue, N. M., Jayne, J. T., and Worsnop, D. R.: Elemental ratio measurements of organic compounds using aerosol mass spectrometry: characterization, improved calibration, and implications, *Atmos. Chem. Phys.*, 15, 253-272, 10.5194/acp-15-253-2015, 2015.
- Eddingsaas, N. C., Loza, C. L., Yee, L. D., Chan, M., Schilling, K. A., Chhabra, P. S., Seinfeld, J. H., and Wennberg, P. O.: alpha-pinene photooxidation under controlled chemical conditions - Part 2: SOA yield and composition in low- and high-NO<sub>x</sub> environments, *Atmos. Chem. Phys.*, 12, 7413-7427, 10.5194/acp-12-7413-2012, 2012.
- Han, Y. M., Stroud, C. A., Liggitto, J., and Li, S. M.: The effect of particle acidity on secondary organic aerosol formation from alpha-pinene photooxidation under atmospherically relevant conditions, *Atmos. Chem. Phys.*, 16, 13929-13944, 10.5194/acp-16-13929-2016, 2016.
- Henry, K. M., Lohaus, T., and Donahue, N. M.: Organic Aerosol Yields from alpha-Pinene Oxidation: Bridging the Gap between First-Generation Yields and Aging Chemistry, *Environ. Sci. Technol.*, 46, 12347-12354, 10.1021/es302060y, 2012.
- McVay, R. C., Zhang, X., Aumont, B., Valorso, R., Camredon, M., La, Y. S., Wennberg, P. O., and Seinfeld, J. H.: SOA formation from the photooxidation of alpha-pinene: systematic exploration of the simulation of chamber data, *Atmos. Chem. Phys.*, 16, 2785-2802, 10.5194/acp-16-2785-2016, 2016.
- Ng, N. L., Chhabra, P. S., Chan, A. W. H., Surratt, J. D., Kroll, J. H., Kwan, A. J., McCabe, D. C., Wennberg, P. O., Sorooshian, A., Murphy, S. M., Dalleska, N. F., Flagan, R. C., and Seinfeld, J. H.: Effect of NO<sub>x</sub> level on secondary organic aerosol (SOA) formation from the photooxidation of terpenes, *Atmos. Chem. Phys.*, 7, 5159-5174, 2007.
- Presto, A. A., Hartz, K. E. H., and Donahue, N. M.: Secondary organic aerosol production from terpene ozonolysis. 2. Effect of NO<sub>x</sub> concentration, *Environ. Sci. Technol.*, 39, 7046-7054, 10.1021/es050400s, 2005.
- Sarrafzadeh, M., Wildt, J., Pullinen, I., Springer, M., Kleist, E., Tillmann, R., Schmitt, S. H., Wu, C., Mentel, T. F., Zhao, D. F., Hastie, D. R., and Kiendler-Scharr, A.: Impact of NO<sub>x</sub> and OH on secondary organic aerosol formation from beta-pinene photooxidation, *Atmos. Chem. Phys.*, 16, 11237-11248, 10.5194/acp-16-11237-2016, 2016.
- Stirnweis, L., Marcolli, C., Dommen, J., Barmet, P., Frege, C., Platt, S. M., Bruns, E. A., Krapf, M., Slowik, J. G., Wolf, R., Prevot, A. S. H., Baltensperger, U., and El-Haddad, I.: Assessing the influence of NO<sub>x</sub> concentrations and relative humidity on secondary organic aerosol yields from alpha-pinene photo-oxidation through smog chamber experiments and modelling calculations, *Atmos. Chem. Phys.*, 17, 5035-5061, 10.5194/acp-17-5035-2017, 2017.
